# Supplementary material for: Leukocyte Associated Immunoglobulin Like Receptor 1 Regulation and Function on Monocytes and Dendritic Cells During Inflammation
Source: PubMed Central journal article supplement (PMC7466540; doi:10.3389/fimmu.2020.01793), 2020-08-19
Supplement: Data_Sheet_1.pdf [file Data_Sheet_1.pdf]

## Supplementary Material

### 1 Supplementary Figures and Tables

#### 1.1 Supplementary Figures

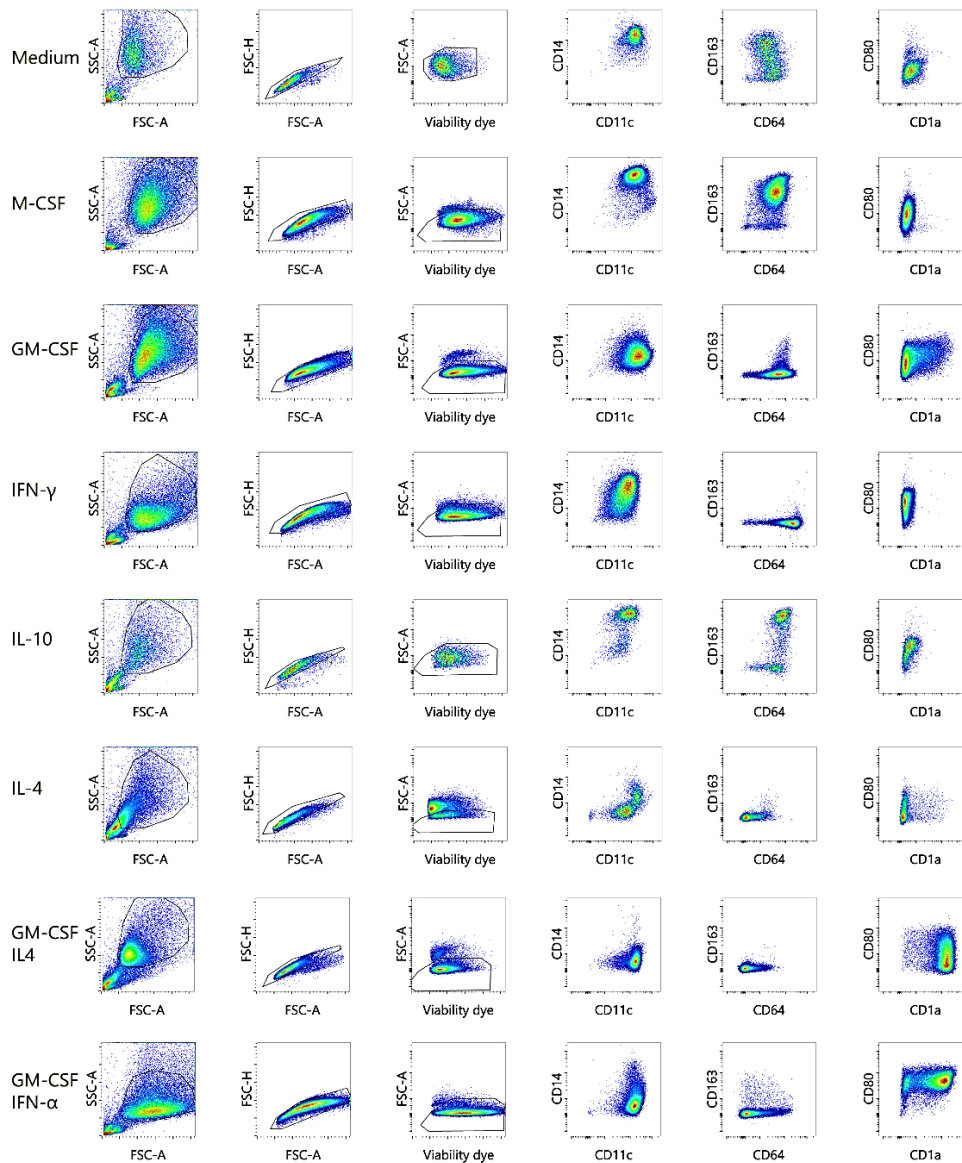

**Supplementary Figure 1.** Analysis strategy and phenotype of monocyte-derived macrophages and dendritic cells.

Flow cytometry gating strategy analysis of the different types of *in vitro* monocyte-derived macrophages and dendritic cells and representative dot plots for the expression of CD14, CD11c, CD163, CD64, CD1a and CD80, used to assess differentiation.

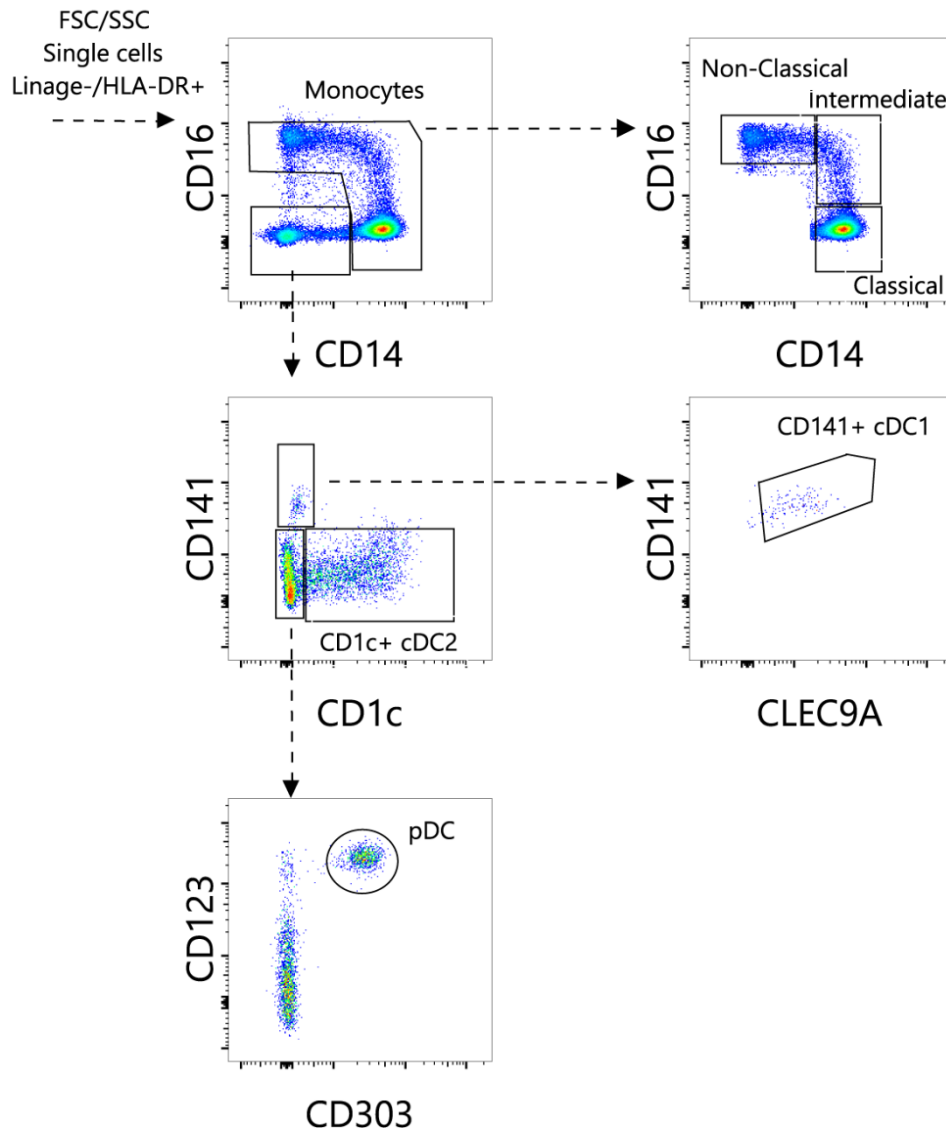

**Supplementary Figure 2.** Analysis strategy to identify classical, intermediate and non-classical monocytes as well as CD1c<sup>+</sup>cDC1s, CD141<sup>+</sup>cDC2s and pDCs.

Flow cytometry gating strategy analysis to identify classical, intermediate and non-classical monocytes as well as CD1c<sup>+</sup>cDC1s, CD141<sup>+</sup>cDC2s and pDCs on peripheral blood mononuclear cells (PBMC).

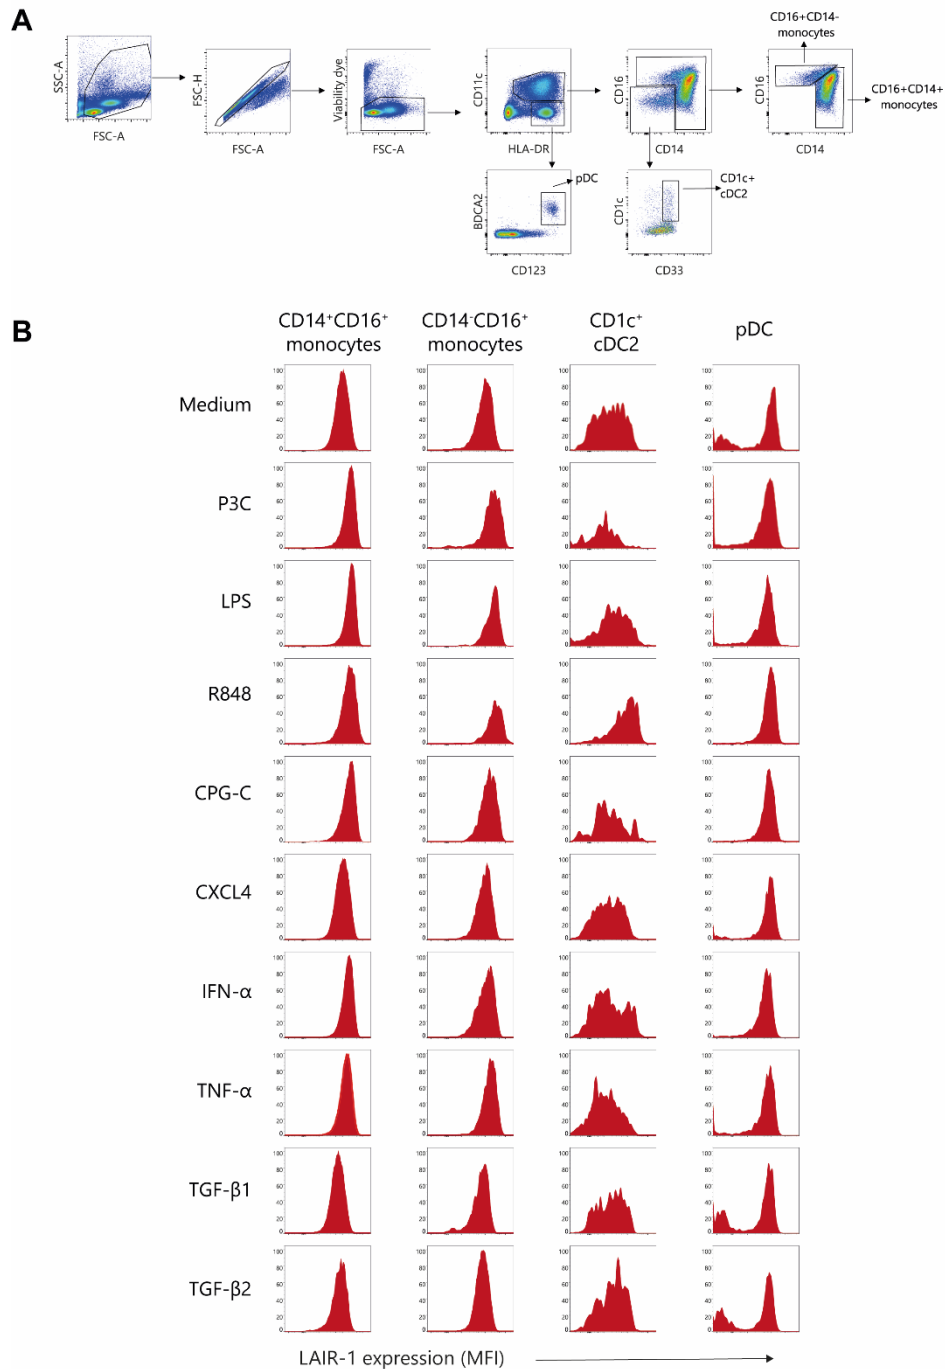

**Supplementary Figure 3.** Analysis strategy to determine LAIR-1 expression on stimulated PBMCs.

**(A)** Flow cytometry gating strategy analysis to identify CD14<sup>+</sup>CD16<sup>+</sup> and CD14<sup>-</sup>CD16<sup>+</sup> monocytes subpopulations as well as CD1c<sup>+</sup> cDC2 and pDC on PBMCs stimulated with different TLR agonists, cytokines and chemokines. **(B)** Representative histogram of LAIR-1 expression on stimulated CD14<sup>+</sup>CD16<sup>+</sup> and CD14<sup>-</sup>CD16<sup>+</sup> monocytes, as well as on CD1c<sup>+</sup> cDC2 and pDC.

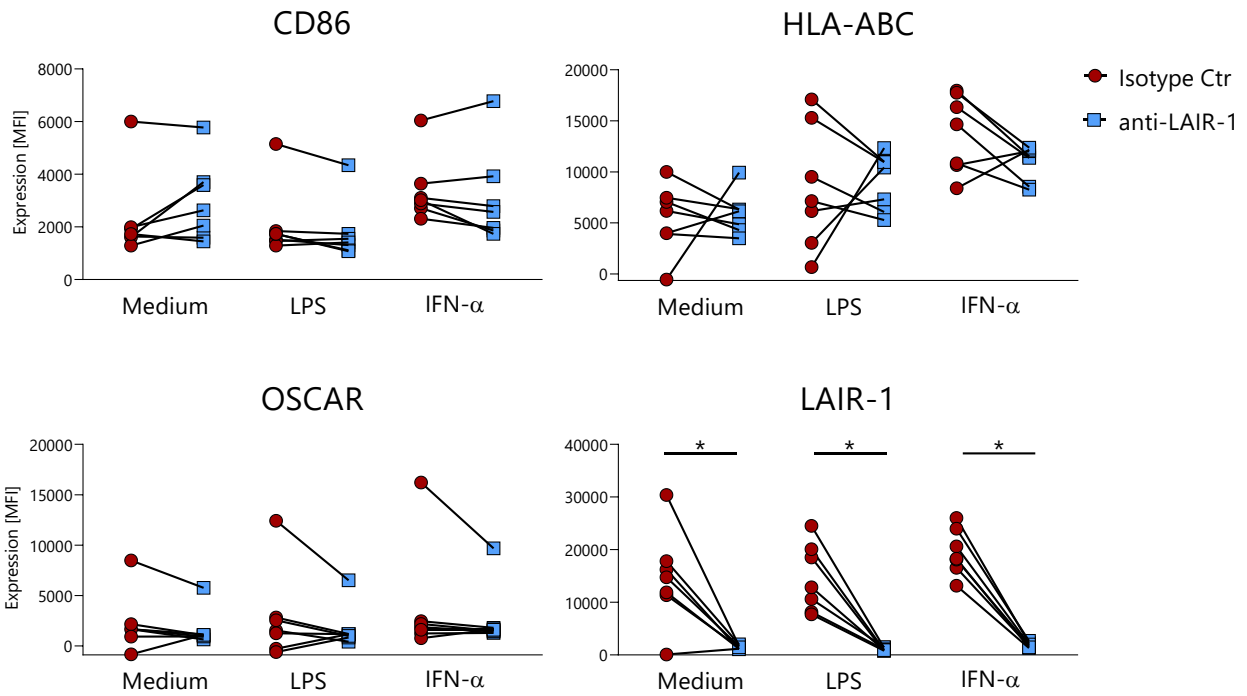

**Supplementary Figure 4.** CD86, HLA-ABC, OSCAR and LAIR-1 expression on monocytes upon LAIR-1 triggering.

Peripheral blood mononuclear cells were pre-treated with anti-LAIR-1 agonist (Dx26) or isotype control (2 h) and stimulated overnight with TLR4 agonist- LPS or IFN $\alpha$  and the expression of CD86, HLA-ABC, Osteoclast-associated immunoglobulin-like receptor (OSCAR) and LAIR-1 was determined on gated monocytes, using flow cytometry. Results are represented as paired samples. Statistically significant differences were considered when \* $p < 0.05$  (Wilcoxon's test).

## 1.2 Supplementary tables

**Supplementary Table 1:** Antibody panels used on the flow cytometry stainings.

### LAIR-1 expression on freshly isolated PBMCs (Fig. 1A-B)

| Target                  | Label       | Manufacturer       | Catalogue nr. | Clone   |
|-------------------------|-------------|--------------------|---------------|---------|
| CD3                     | AF700       | Biolegend          | 300424        | UCHT1   |
| CD19                    | AF700       | eBioscience        | 56-0199-42    | HIB19   |
| CD56                    | AF700       | BD Pharmingen      | 557919        | B159    |
| CD1c                    | BV421       | Sony Biotechnology | 2257630       | L161    |
| CD14                    | APC-eFluor  | eBioscience        | 47-0149-42    | 61D3    |
| CD16                    | V500        | BD Horizon         | 561394        | 3G8     |
| CD123                   | PE-Cy7      | Biolegend          | 306010        | 6H6     |
| CD141                   | BV711       | BD Horizon         | 563155        | 1A4     |
| CLEC9A                  | FITC        | Miltenyi Biotec    | 130-097-403   | 8F9     |
| CD303                   | PerCP-Cy5.5 | Sony Biotechnology | 2371050       | 201A    |
| HLA-DR                  | BV605       | BD Horizon         | 562845        | G46-6   |
| LAIR-1                  | PE          | BD Pharmingen      | 550811        | DX26    |
| Isotype control<br>IgG1 | PE          | BD Pharmingen      | 555749        | MOPC-21 |

**LAIR-1 expression on skin (Fig. 1D)**

| <b>Target</b>            | <b>Label</b> | <b>Manufacturer</b>                | <b>Catalogue nr.</b> | <b>Clone</b> |
|--------------------------|--------------|------------------------------------|----------------------|--------------|
| CD90                     | PECy7        | Biolegend                          | 328124               | 3.9          |
| CD1c                     | BV421        | Biolegend                          | 331526               | L161         |
| CD45 PerCP               | PerCP-Cy5.5  | Biolegend                          | 304026               | IT2.2        |
| HLA-DR                   | BV605        | BD Biosciences                     | 562845               | 3G8          |
| CD141                    | BV711        | BD Biosciences                     | 563155               | 6H6          |
| CD14                     | BV785        | Biolegend                          | 301840               | AC144        |
| CD1a                     | BV510        | BD Biosciences                     | 563481               | M5E2         |
| CD11c                    | AF700        | eBioscience                        | 56-0116-42           | G46-6        |
| LAIR-1                   | PE           | BD Pharmingen                      | 550811               | P67.6        |
| Isotype control<br>IgG1  | PE           | BD Pharmingen                      | 555749               | DX26         |
| Fixable Viability<br>Dye | eFluor 780   | Bioscience<br>Thermo<br>Scientific | Fisher<br>65-0865-14 | -            |

\* autofluorescence detected on FITC channel was used to define tissue macrophages.

**LAIR-1 expression on stimulated PBMC (Fig. 2C)**

| <b>Target</b>         | <b>Label</b>  | <b>Manufacturer</b>             | <b>Catalogue nr.</b> | <b>Clone</b> |
|-----------------------|---------------|---------------------------------|----------------------|--------------|
| CD11c                 | AF700         | eBioscience                     | 56-0116-42           | 3.9          |
| CD1c                  | BV421         | Sony Biotechnology              | 2257630              | L161         |
| CD86                  | BV605         | Biolegend                       | 305430               | IT2.2        |
| CD16                  | V500          | BD Horizon                      | 561394               | 3G8          |
| CD123                 | PE-Cy7        | Biolegend                       | 306010               | 6H6          |
| BDCA2                 | APC           | Miltenyi Biotec                 | 130-090-905          | AC144        |
| CD14                  | BV785         | Biolegend                       | 301840               | M5E2         |
| HLA-DR                | FITC          | BD Pharmingen                   | 555811               | G46-6        |
| CD33                  | PerCP-Cy5.5   | BD Biosciences                  | 333146               | P67.6        |
| LAIR-1                | PE            | BD Pharmingen                   | 550811               | DX26         |
| Fixable Viability Dye | eFluor 780    | Bioscience<br>Thermo Scientific | Fisher<br>65-0865-14 | -            |
| Isotype IgG1          | control<br>PE | BD Pharmingen                   | 555749               | MOPC-21      |

**LAIR-1 mediated inhibition on PBMC (Fig. 3A)**

| <b>Target</b>         | <b>Label</b> | <b>Manufacturer</b>             | <b>Catalogue nr.</b> | <b>Clone</b> |
|-----------------------|--------------|---------------------------------|----------------------|--------------|
| CD14                  | BV785        | Biolegend                       | 301840               | M5E2         |
| CD16                  | V500         | BD Biosciences                  | 561394               | 3G8          |
| HLA-DR                | BV605        | BD Biosciences                  | 562845               | G46-6        |
| CD45                  | PerCP        | Biolegend                       | 304026               | HI30         |
| CD86                  | PB           | Biolegend                       | 2127090              | IT2.2        |
| OSCAR                 | PE           | Beckman Coulter                 | A24987               | 11.1CN5      |
| HLA-ABC               | PE-Cy7       | BD Biosciences                  | 561349               | G46-2.6      |
| LAIR1                 | AF647        | Sony Biotechnology              | 2314010              | NKTA255      |
| CD80                  | FITC         | BD Pharmingen                   | 557226               | L307.4       |
| Fixable Viability Dye | eFluor 780   | Bioscience<br>Thermo Scientific | Fisher<br>65-0865-14 |              |



**LAIR-1 expression on monocyte derived- macrophages / dendritic cells (Fig 4A-B)**

| <b>Target</b>            | <b>Label</b> | <b>Manufacturer</b>             | <b>Catalogue nr.</b> | <b>Clone</b> |
|--------------------------|--------------|---------------------------------|----------------------|--------------|
| CD1a                     | eF450        | eBioscience                     | 48-0019              | HI149        |
| CD80                     | APC-H7       | BD Pharmingen                   | 561134               | L307.4       |
| CD64                     | PE-Cy7       | BD Pharmingen                   | 561191               | 10.1         |
| CD163                    | APC          | eBioscience                     | 17-1639-42           | eBioGHI/61   |
| LAIR1                    | PE           | BD Pharmingen                   | 550811               | DX26         |
| CD11c                    | FITC         | Sony Biotechnology              | 2286070              | Bu15         |
| CD14                     | PerCPCy55.5  | Biolegend                       | 325622               | HCD14        |
| CD1a                     | eF450        | eBioscience                     | 48-0019              | HI149        |
| CD80                     | APC-H7       | BD Pharmingen                   | 561134               | L307.4       |
| CD64                     | PE-Cy7       | BD Pharmingen                   | 561191               | 10.1         |
| LAIR1                    | PE           | BD Pharmingen                   | 550811               | DX26         |
| Isotype control<br>IgG1  | PE           | BD Pharmingen                   | 555749               | MOPC-21      |
| Fixable Viability<br>Dye | eFluor 506   | Bioscience<br>Thermo Scientific | Fisher<br>65-0866-14 | -            |

**Monocyte derived- dendritic cells phenotype (Fig. 5A-B)**

| <b>Target</b> | <b>Label</b>  | <b>Manufacturer</b> | <b>Catalogue nr.</b> | <b>Clone</b> |
|---------------|---------------|---------------------|----------------------|--------------|
| CD14          | PerCP-Cy5.5   | Biolegend           | 301824               | M5E2         |
| CD11c         | AF700         | eBioscience         | 56-0116-42           | 3.9          |
| CD1a          | BV510         | BD Biosciences      | 563481               | HI149        |
| CD1c (BDCA1)  | BV421         | Biolegend           | 331526               | L161         |
| LAIR1         | AF647         | Sony Biotechnology  | 2314010              | NKTA255      |
| CD86          | BV605         | Biolegend           | 305430               | IT2.2        |
| HLA (MHCII)   | DR<br>BV711   | BD Biosciences      | 563696               | G46-6        |
| HLA (MHCI)    | ABC<br>PE-Cy7 | BD Biosciences      | 561349               | G46-2.6      |
| OSCAR         | PE            | Beckman Coulter     | A24987               | 11.1CN5      |
| CD80          | APC-H7        | BD Pharmingen       | 561134               | L307.4       |
| CD141 (BDCA3) | FITC          | Miltenyi Biotec     | 130-090-513          | AD5-14H12    |

**Supplementary table 2. Primer sequences used for RT-qPCR**

| Gene          | Foward Sequence 5' - 3' | Reverse Sequence 5' - 3'  |
|---------------|-------------------------|---------------------------|
| <i>B2M</i>    | GATGAGTATGCCTGCCGTGT    | TGCGGCATCTTCAAACCTCC      |
| <i>RPL13A</i> | CCTGGAGGAGAAGAGGAAAGAGA | TTGAGGACCTCTGTGTATTTGTCAA |
| <i>IL12A</i>  | CTCCAGAAGGCCAGACAAAC    | AATGGTAAACAGGCCTCCACT     |
| <i>IL23A</i>  | GCTTGCAAAGGATCCACCA     | TCCGATCCTAGCAGCTTCTCA     |
| <i>IL27A</i>  | ATCTCACCTGCCAGGAGTGAA   | TGAAGCGTGGTGGAGATGAAG     |
| <i>IL1B</i>   | TTTGAGTCTGCCAGTTCCC     | TCAGTTATATCCTGGCCGCC      |
| <i>IL10</i>   | GAGGCTACGGCGCTGTCAT     | CCACGGCCTTGCTCTTGTT       |
| <i>TNF</i>    | GGAGAAGGGTGACCGACTCA    | CTGCCCAGACTCGGCAA         |
| <i>IL6</i>    | TGCAATAACCACCCCTGACC    | TGCGCAGAATGAGATGAGTTG     |
| <i>IL8</i>    | TGAGAGTGGACCACACTGCG    | TCTCCACAACCCTCTGCACC      |
| <i>TNF</i>    | GGAGAAGGGTGACCGACTCA    | CTGCCCAGACTCGGCAA         |
| <i>IL8</i>    | TGAGAGTGGACCACACTGCG    | TCTCCACAACCCTCTGCACC      |
| <i>CXCL10</i> | TGAAATTATTCCTGCAAGCCAA  | CAGACATCTCTTCTCACCCTTCTTT |
| <i>CCL2</i>   | TCTGTGCCTGCTGCTCATAG    | GGGCATTGATTGCATCTGGC      |
| <i>TLR7</i>   | CAAGAAAGTTGATGCTATTGGGC | TGGTTGAAGAGAGCAGAGCA      |
| <i>IL10</i>   | GAGGCTACGGCGCTGTCAT     | CCACGGCCTTGCTCTTGTT       |
| <i>STAT1</i>  | ATGGCAGTCTGGCGGCTGAATT  | CCAAACCAGGCTGGCACAATTG    |
